# Supplementary material for: Non-invasive diagnostic tool for Parkinson’s disease by sebum RNA profile with machine learning
Source: PubMed Central journal article supplement (PMC8452747; doi:10.1038/s41598-021-98423-9), 2021-09-20
Supplement: 41598_2021_98423_MOESM1_ESM.pdf [file 41598_2021_98423_MOESM1_ESM.pdf]

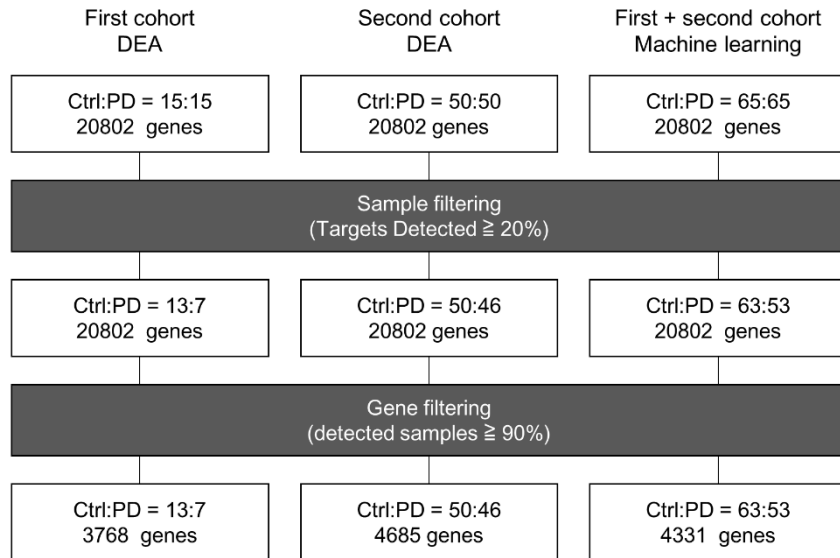

**Supplementary Fig. S1. Data cleaning for the SSL-RNA analysis.**

Cutoff criteria of the samples and genes. In the first cohort, 20 samples and 3768 genes were selected, and 96 samples and 4685 genes were selected in the second cohort. For machine learning, both cohorts were combined, and 116 samples and 4331 genes passed. Abbreviations: Ctrl = healthy controls; DEA = differential expression analysis; PD = Parkinson's disease.

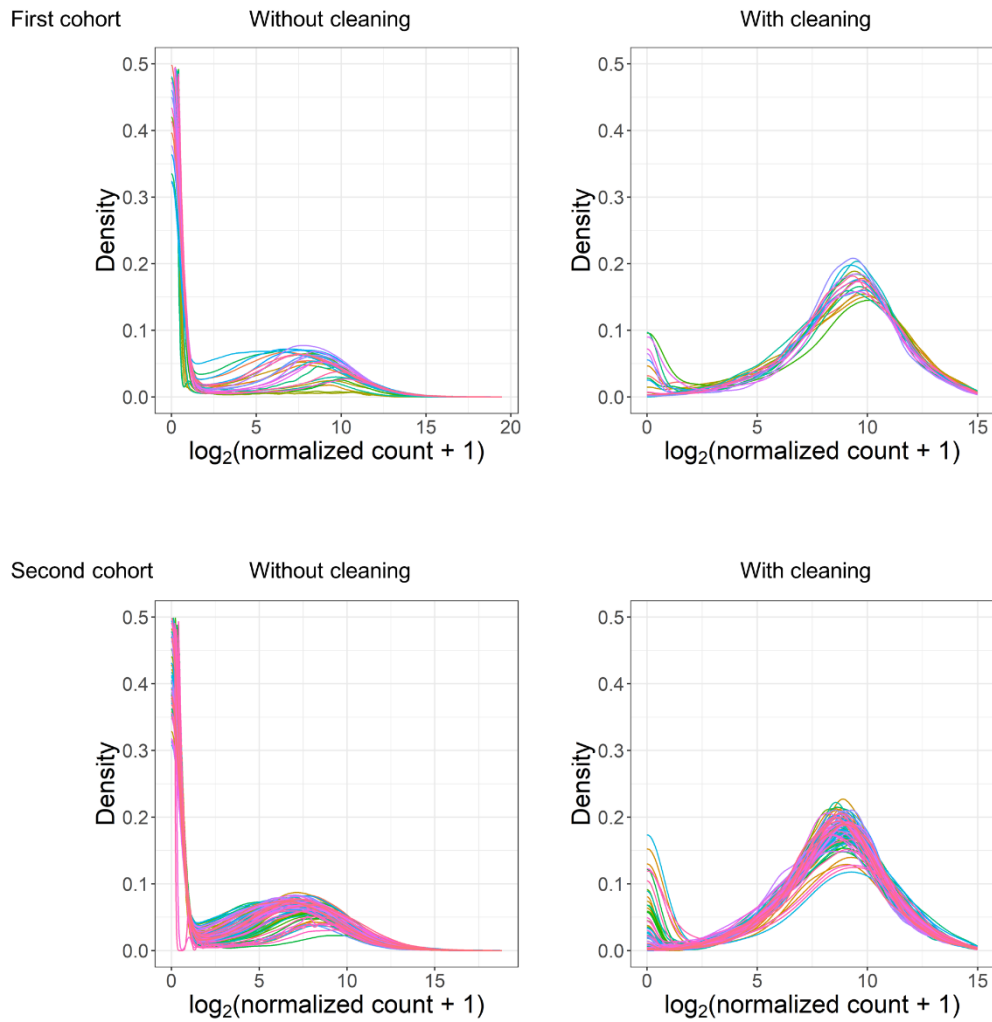

**Supplementary Fig. S2. Effects of data cleaning to normalization.**

Probability density distribution of the  $\log_2$ -transformed normalized count + 1, with or without data cleaning. Each plot represents the distribution of SSL-RNA expression levels in each sample. The uniformity of distribution was improved with data cleaning.

a

|                                 | Female and male |                   | Male only       |                   |
|---------------------------------|-----------------|-------------------|-----------------|-------------------|
|                                 | Healthy control | PD                | Healthy control | PD                |
| Number                          | 13              | 7                 | 6               | 6                 |
| Female : Male                   | 7 : 6           | 1 : 6             | 0 : 6           | 0 : 6             |
| Age (mean $\pm$ SD)             | 61.1 $\pm$ 11.7 | 58.4 $\pm$ 10.1   | 56.8 $\pm$ 10.1 | 56.3 $\pm$ 9.34   |
| H&Y (cases)                     | (NA)            | I (7), II (0)     | (NA)            | I (6)             |
| H&Y (mean $\pm$ SD)             | (NA)            | 1.00 $\pm$ 0      | (NA)            | 1.00 $\pm$ 0      |
| Duration (year, mean $\pm$ SD)  | (NA)            | 0.643 $\pm$ 0.639 | (NA)            | 0.667 $\pm$ 0.687 |
| <i>De novo</i> patients (cases) | (NA)            | 7                 | (NA)            | 6                 |

b

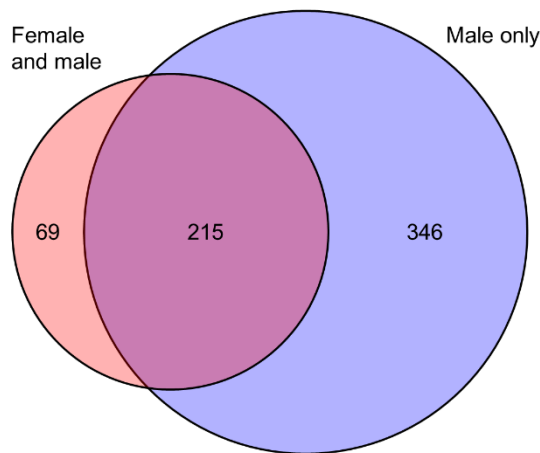

c

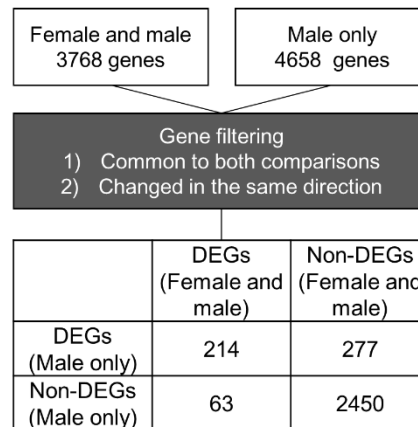

**Supplementary Fig. S3. Effect of the female samples on differential expression analysis in the first cohort.**

(a) Characteristics of male only and female and male groups. (b) Venn diagram of DEGs in both groups. (c) The overlap between male and female and male groups. Genes were filtered before comparison. The overlap of DEGs was tested by Fisher's exact test ( $p < 0.01$ ). Abbreviations: SD = standard deviation; H&Y = Hoehn and Yahr stage; NA = not available; PD = Parkinson's disease; DEG = differentially expressed genes.

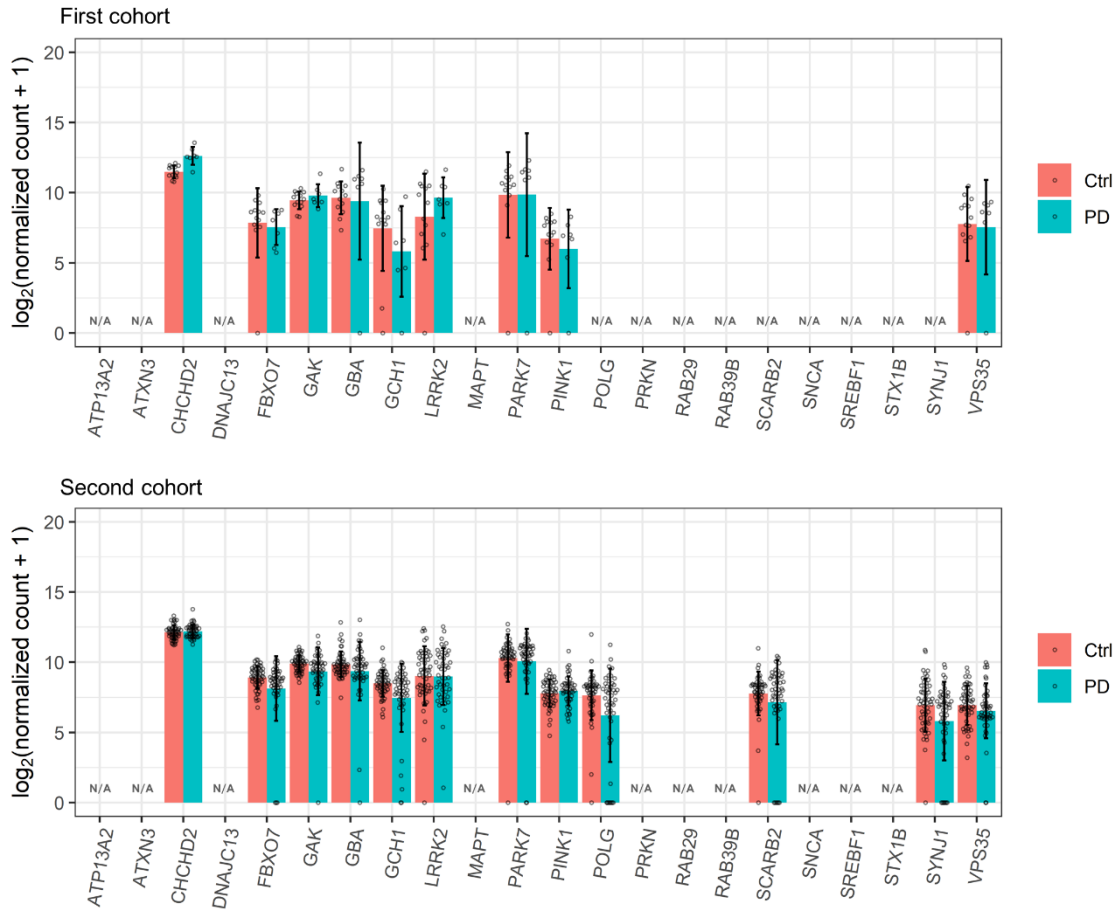

**Supplementary Fig. S4. SSL-RNA expression changes in known PD genes.**

Expression levels of known PD genes. Bar plots and error bars show the mean  $\pm$  SD.

Beeswarm plots represent the gene expression levels in each subject. Abbreviations:

Ctrl = control; N/A = not available; PD = Parkinson's disease.

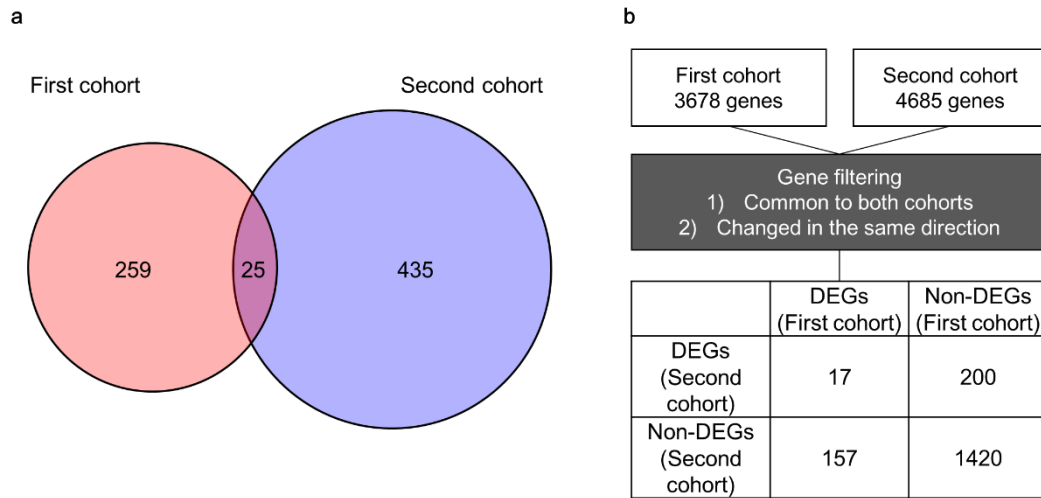

**Supplementary Fig. S5. Overlap of DEGs between first and second cohorts.**

(a) Venn diagram of DEGs in both cohorts. (b) Overlap between male and female and male groups. Genes were filtered before comparison. The overlap of DEGs was tested by Fisher's exact test (not significant). Abbreviations: DEG = differentially expressed genes.

**Supplementary Table S1. Characteristics of participants after data cleaning.**

|                                 | First cohort    |                   | Second cohort   |                        |
|---------------------------------|-----------------|-------------------|-----------------|------------------------|
|                                 | Healthy control | PD                | Healthy control | PD                     |
| Number                          | 13              | 7                 | 50              | 46                     |
| Female : Male                   | 7 : 6           | 1 : 6             | 0 : 50          | 0 : 46                 |
| Age (mean $\pm$ SD)             | 61.1 $\pm$ 11.7 | 58.4 $\pm$ 10.1   | 66.8 $\pm$ 9.08 | 64.2 $\pm$ 10.9        |
| H&Y (cases)                     | (NA)            | I (7), II (0)     | (NA)            | 0 (2), I (17), II (27) |
| H&Y (mean $\pm$ SD)             | (NA)            | 1.00 $\pm$ 0      | (NA)            | 1.54 $\pm$ 0.579       |
| Duration (year, mean $\pm$ SD)  | (NA)            | 0.643 $\pm$ 0.639 | (NA)            | 5.67 $\pm$ 4.35        |
| <i>De novo</i> patients (cases) | (NA)            | 7                 | (NA)            | 7                      |

Abbreviations: NA = not available; SD = standard deviation.

**Supplementary Table S2. GO terms and KEGG pathways obtained by DEGs with an FDR threshold of less than 0.05.**

| Cohort | Regulation | Category         | Term                                                                              | Count (%) | p-value  | FDR     |
|--------|------------|------------------|-----------------------------------------------------------------------------------|-----------|----------|---------|
| First  | DOWN       | GOTERM_BP_DIRECT | GO:0000184~nuclear-transcribed mRNA catabolic process,<br>nonsense-mediated decay | 7 (8.86)  | 1.29E-05 | 0.00677 |
|        |            | GOTERM_BP_DIRECT | GO:0006614~SRP-dependent cotranslational protein<br>targeting to membrane         | 6 (7.59)  | 5.49E-05 | 0.0144  |
|        |            | GOTERM_BP_DIRECT | GO:0019083~viral transcription                                                    | 6 (7.59)  | 0.000126 | 0.0221  |
|        |            | KEGG_PATHWAY     | hsa03010:Ribosome                                                                 | 7 (8.86)  | 0.000136 | 0.0116  |
|        |            | GOTERM_BP_DIRECT | GO:0006413~translational initiation                                               | 6 (7.59)  | 0.000323 | 0.0424  |
|        |            | GOTERM_BP_DIRECT | GO:0006412~translation                                                            | 7 (8.86)  | 0.000807 | 0.0848  |
|        |            | GOTERM_BP_DIRECT | GO:0098609~cell-cell adhesion                                                     | 7 (8.86)  | 0.00115  | 0.101   |
|        |            | GOTERM_BP_DIRECT | GO:0006364~rRNA processing                                                        | 6 (7.59)  | 0.00239  | 0.179   |
|        |            | KEGG_PATHWAY     | hsa04144:Endocytosis                                                              | 7 (8.86)  | 0.00279  | 0.119   |
|        |            | GOTERM_BP_DIRECT | GO:0000027~ribosomal large subunit assembly                                       | 3 (3.80)  | 0.00371  | 0.244   |
|        |            | GOTERM_BP_DIRECT | GO:0035088~establishment or maintenance of apical/basal<br>cell polarity          | 2 (2.53)  | 0.0216   | 1.00    |
|        |            | GOTERM_BP_DIRECT | GO:0006897~endocytosis                                                            | 4 (5.06)  | 0.0227   | 1.00    |
|        |            | KEGG_PATHWAY     | hsa05203:Viral carcinogenesis                                                     | 5 (6.33)  | 0.0328   | 0.930   |
|        |            | GOTERM_BP_DIRECT | GO:0016197~endosomal transport                                                    | 3 (3.80)  | 0.0334   | 1.00    |
|        |            | GOTERM_BP_DIRECT | GO:1904903~ESCRT III complex disassembly                                          | 2 (2.53)  | 0.0426   | 1.00    |
|        |            | GOTERM_BP_DIRECT | GO:1902188~positive regulation of viral release from host cell                    | 2 (2.53)  | 0.0468   | 1.00    |

|    |                  |                                                                                    |          |        |       |
|----|------------------|------------------------------------------------------------------------------------|----------|--------|-------|
|    | GOTERM_BP_DIRECT | GO:1901653~cellular response to peptide                                            | 2 (2.53) | 0.0468 | 1.00  |
|    | GOTERM_BP_DIRECT | GO:0048013~ephrin receptor signaling pathway                                       | 3 (3.80) | 0.0539 | 1.00  |
|    | KEGG_PATHWAY     | hsa05211:Renal cell carcinoma                                                      | 3 (3.80) | 0.0585 | 1.00  |
|    | GOTERM_BP_DIRECT | GO:1901673~regulation of mitotic spindle assembly                                  | 2 (2.53) | 0.0592 | 1.00  |
|    | GOTERM_BP_DIRECT | GO:0007034~vacuolar transport                                                      | 2 (2.53) | 0.0674 | 1.00  |
|    | GOTERM_BP_DIRECT | GO:0097194~execution phase of apoptosis                                            | 2 (2.53) | 0.0674 | 1.00  |
|    | GOTERM_BP_DIRECT | GO:0000920~cell separation after cytokinesis                                       | 2 (2.53) | 0.0755 | 1.00  |
|    | GOTERM_BP_DIRECT | GO:0010824~regulation of centrosome duplication                                    | 2 (2.53) | 0.0795 | 1.00  |
|    | GOTERM_BP_DIRECT | GO:0051493~regulation of cytoskeleton organization                                 | 2 (2.53) | 0.0795 | 1.00  |
|    | GOTERM_BP_DIRECT | GO:0006886~intracellular protein transport                                         | 4 (5.06) | 0.0834 | 1.00  |
|    | GOTERM_BP_DIRECT | GO:0050850~positive regulation of calcium-mediated signaling                       | 2 (2.53) | 0.0835 | 1.00  |
|    | KEGG_PATHWAY     | hsa05132:Salmonella infection                                                      | 3 (3.80) | 0.0872 | 1.00  |
|    | GOTERM_BP_DIRECT | GO:0006921~cellular component disassembly involved in execution phase of apoptosis | 2 (2.53) | 0.0875 | 1.00  |
|    | GOTERM_BP_DIRECT | GO:0039702~viral budding via host ESCRT complex                                    | 2 (2.53) | 0.0915 | 1.00  |
|    | GOTERM_BP_DIRECT | GO:0007264~small GTPase mediated signal transduction                               | 4 (5.06) | 0.0917 | 1.00  |
|    | GOTERM_BP_DIRECT | GO:0015031~protein transport                                                       | 5 (6.33) | 0.0930 | 1.00  |
|    | KEGG_PATHWAY     | hsa05168:Herpes simplex infection                                                  | 4 (5.06) | 0.0947 | 1.00  |
|    | KEGG_PATHWAY     | hsa04062:Chemokine signaling pathway                                               | 4 (5.06) | 0.0983 | 1.00  |
|    | GOTERM_BP_DIRECT | GO:0043547~positive regulation of GTPase activity                                  | 6 (7.59) | 0.0991 | 1.00  |
| UP | KEGG_PATHWAY     | hsa00190:Oxidative phosphorylation                                                 | 2 (13.3) | 0.0751 | 0.321 |



|        |                  |                                                          |                                                                                 |           |          |          |
|--------|------------------|----------------------------------------------------------|---------------------------------------------------------------------------------|-----------|----------|----------|
|        | KEGG_PATHWAY     | hsa05012:Parkinson's disease                             | 2 (13.3)                                                                        | 0.0801    | 0.321    |          |
|        | GOTERM_BP_DIRECT | GO:0006511~ubiquitin-dependent protein catabolic process | 2 (13.3)                                                                        | 0.0934    | 1.00     |          |
|        | KEGG_PATHWAY     | hsa05010:Alzheimer's disease                             | 2 (13.3)                                                                        | 0.0942    | 0.321    |          |
| Second | DOWN             | GOTERM_BP_DIRECT                                         | GO:0006915~apoptotic process                                                    | 11 (22.5) | 1.96E-06 | 0.000864 |
|        |                  | GOTERM_BP_DIRECT                                         | GO:0006954~inflammatory response                                                | 8 (16.3)  | 6.12E-05 | 0.0135   |
|        |                  | GOTERM_BP_DIRECT                                         | GO:0043066~negative regulation of apoptotic process                             | 6 (12.2)  | 0.00716  | 1.00     |
|        |                  | KEGG_PATHWAY                                             | hsa04380:Osteoclast differentiation                                             | 4 (8.16)  | 0.00798  | 0.566    |
|        |                  | GOTERM_BP_DIRECT                                         | GO:0048146~positive regulation of fibroblast proliferation                      | 3 (6.12)  | 0.00920  | 1.00     |
|        |                  | GOTERM_BP_DIRECT                                         | GO:0045944~positive regulation of transcription from RNA polymerase II promoter | 8 (16.3)  | 0.0147   | 1.00     |
|        |                  | GOTERM_BP_DIRECT                                         | GO:0071347~cellular response to interleukin-1                                   | 3 (6.12)  | 0.0155   | 1.00     |
|        |                  | GOTERM_BP_DIRECT                                         | GO:0016236~macroautophagy                                                       | 3 (6.12)  | 0.0177   | 1.00     |
|        |                  | KEGG_PATHWAY                                             | hsa05323:Rheumatoid arthritis                                                   | 3 (6.12)  | 0.0317   | 1.00     |
|        |                  | GOTERM_BP_DIRECT                                         | GO:0071356~cellular response to tumor necrosis factor                           | 3 (6.12)  | 0.0351   | 1.00     |
|        |                  | GOTERM_BP_DIRECT                                         | GO:1900745~positive regulation of p38MAPK cascade                               | 2 (4.08)  | 0.0420   | 1.00     |
|        |                  | GOTERM_BP_DIRECT                                         | GO:0051412~response to corticosterone                                           | 2 (4.08)  | 0.0472   | 1.00     |
|        |                  | GOTERM_BP_DIRECT                                         | GO:0051092~positive regulation of NF-kappaB transcription factor activity       | 3 (6.12)  | 0.0494   | 1.00     |
|        |                  | GOTERM_BP_DIRECT                                         | GO:0010629~negative regulation of gene expression                               | 3 (6.12)  | 0.0521   | 1.00     |
|        |                  | GOTERM_BP_DIRECT                                         | GO:0007050~cell cycle arrest                                                    | 3 (6.12)  | 0.0548   | 1.00     |
|        |                  | KEGG_PATHWAY                                             | hsa04068:FoxO signaling pathway                                                 | 3 (6.12)  | 0.0675   | 1.00     |
|        |                  | GOTERM_BP_DIRECT                                         | GO:0048247~lymphocyte chemotaxis                                                | 2 (4.08)  | 0.0724   | 1.00     |

|    |                  |                                                                                |          |          |          |
|----|------------------|--------------------------------------------------------------------------------|----------|----------|----------|
|    | GOTERM_BP_DIRECT | GO:2000379~positive regulation of reactive oxygen species metabolic process    | 2 (4.08) | 0.0774   | 1.00     |
|    | GOTERM_BP_DIRECT | GO:0048167~regulation of synaptic plasticity                                   | 2 (4.08) | 0.0824   | 1.00     |
|    | GOTERM_BP_DIRECT | GO:0031663~lipopolysaccharide-mediated signaling pathway                       | 2 (4.08) | 0.0824   | 1.00     |
|    | GOTERM_BP_DIRECT | GO:0030335~positive regulation of cell migration                               | 3 (6.12) | 0.0871   | 1.00     |
|    | GOTERM_BP_DIRECT | GO:0000422~mitophagy                                                           | 2 (4.08) | 0.0897   | 1.00     |
| UP | GOTERM_BP_DIRECT | GO:0031424~keratinization                                                      | 8 (19.1) | 6.25E-12 | 1.11E-09 |
|    | GOTERM_BP_DIRECT | GO:0006413~translational initiation                                            | 9 (21.4) | 3.12E-10 | 2.76E-08 |
|    | GOTERM_BP_DIRECT | GO:0006614~SRP-dependent cotranslational protein targeting to membrane         | 8 (19.1) | 8.12E-10 | 4.79E-08 |
|    | KEGG_PATHWAY     | hsa03010:Ribosome                                                              | 8 (19.1) | 1.57E-09 | 2.20E-08 |
|    | GOTERM_BP_DIRECT | GO:0019083~viral transcription                                                 | 8 (19.1) | 2.80E-09 | 1.24E-07 |
|    | GOTERM_BP_DIRECT | GO:0000184~nuclear-transcribed mRNA catabolic process, nonsense-mediated decay | 8 (19.1) | 4.29E-09 | 1.52E-07 |
|    | GOTERM_BP_DIRECT | GO:0018149~peptide cross-linking                                               | 6 (14.3) | 5.78E-08 | 1.71E-06 |
|    | GOTERM_BP_DIRECT | GO:0006364~rRNA processing                                                     | 8 (19.1) | 2.46E-07 | 6.22E-06 |
|    | GOTERM_BP_DIRECT | GO:0030216~keratinocyte differentiation                                        | 6 (14.3) | 4.85E-07 | 1.07E-05 |
|    | GOTERM_BP_DIRECT | GO:0006412~translation                                                         | 8 (19.1) | 7.61E-07 | 0.000015 |
|    | GOTERM_BP_DIRECT | GO:0008544~epidermis development                                               | 6 (14.3) | 8.50E-07 | 0.000015 |
|    | GOTERM_BP_DIRECT | GO:0042254~ribosome biogenesis                                                 | 4 (9.52) | 5.65E-05 | 0.000909 |
|    | GOTERM_BP_DIRECT | GO:0002181~cytoplasmic translation                                             | 3 (7.14) | 0.00123  | 0.0181   |
|    | GOTERM_BP_DIRECT | GO:0031069~hair follicle morphogenesis                                         | 3 (7.14) | 0.00143  | 0.0195   |

|                  |                                                                       |          |        |       |
|------------------|-----------------------------------------------------------------------|----------|--------|-------|
| GOTERM_BP_DIRECT | GO:0098609~cell-cell adhesion                                         | 4 (9.52) | 0.0186 | 0.235 |
| GOTERM_BP_DIRECT | GO:0045109~intermediate filament organization                         | 2 (4.76) | 0.0328 | 0.388 |
| GOTERM_BP_DIRECT | GO:0045653~negative regulation of megakaryocyte differentiation       | 2 (4.76) | 0.0369 | 0.408 |
| GOTERM_BP_DIRECT | GO:0071385~cellular response to glucocorticoid stimulus               | 2 (4.76) | 0.0409 | 0.426 |
| GOTERM_BP_DIRECT | GO:0007010~cytoskeleton organization                                  | 3 (7.14) | 0.0442 | 0.435 |
| GOTERM_BP_DIRECT | GO:0016233~telomere capping                                           | 2 (4.76) | 0.0469 | 0.437 |
| GOTERM_BP_DIRECT | GO:0006336~DNA replication-independent nucleosome assembly            | 2 (4.76) | 0.0528 | 0.462 |
| GOTERM_BP_DIRECT | GO:0032200~telomere organization                                      | 2 (4.76) | 0.0548 | 0.462 |
| GOTERM_BP_DIRECT | GO:0006335~DNA replication-dependent nucleosome assembly              | 2 (4.76) | 0.0646 | 0.520 |
| GOTERM_BP_DIRECT | GO:0097192~extrinsic apoptotic signaling pathway in absence of ligand | 2 (4.76) | 0.0685 | 0.527 |
| GOTERM_BP_DIRECT | GO:0006352~DNA-templated transcription, initiation                    | 2 (4.76) | 0.0724 | 0.527 |
| GOTERM_BP_DIRECT | GO:0000183~chromatin silencing at rDNA                                | 2 (4.76) | 0.0744 | 0.527 |
| GOTERM_BP_DIRECT | GO:0051290~protein heterotetramerization                              | 2 (4.76) | 0.0840 | 0.543 |
| GOTERM_BP_DIRECT | GO:1904837~beta-catenin-TCF complex assembly                          | 2 (4.76) | 0.0859 | 0.543 |
| GOTERM_BP_DIRECT | GO:0034080~CENP-A containing nucleosome assembly                      | 2 (4.76) | 0.0859 | 0.543 |
| GOTERM_BP_DIRECT | GO:0045814~negative regulation of gene expression, epigenetic         | 2 (4.76) | 0.0992 | 0.605 |

---

Enriched GO terms and KEGG pathways were yielded by DAVID (Category: GOTERM\_BP\_DIRECT and KEGG\_PATHWAY) in each

cohort using the downregulated or upregulated DEGs with an FDR threshold of less than 0.05.

**Supplementary Table S3. KEGG pathways obtained using the DEGs in each cohort.**

| Cohort                             | Regulation | Term                                                 | Count (%) | p-value                                            | FDR      |
|------------------------------------|------------|------------------------------------------------------|-----------|----------------------------------------------------|----------|
| First                              | DOWN       | hsa03010:Ribosome                                    | 13 (6.28) | 1.21E-06                                           | 0.000180 |
|                                    |            | hsa04144:Endocytosis                                 | 15 (7.25) | 2.13E-05                                           | 0.00159  |
|                                    |            | hsa05203:Viral carcinogenesis                        | 11 (5.31) | 0.00135                                            | 0.0670   |
|                                    |            | hsa05211:Renal cell carcinoma                        | 6 (2.90)  | 0.00363                                            | 0.135    |
|                                    |            | hsa05168:Herpes simplex infection                    | 9 (4.35)  | 0.00787                                            | 0.196    |
|                                    |            | hsa05130:Pathogenic Escherichia coli infection       | 5 (2.42)  | 0.00815                                            | 0.196    |
|                                    |            | hsa04670:Leukocyte transendothelial migration        | 7 (3.38)  | 0.00920                                            | 0.196    |
|                                    |            | hsa05323:Rheumatoid arthritis                        | 6 (2.90)  | 0.0121                                             | 0.226    |
|                                    |            | hsa04141:Protein processing in endoplasmic reticulum | 8 (3.86)  | 0.0167                                             | 0.251    |
|                                    |            | hsa03040:Spliceosome                                 | 7 (3.38)  | 0.0179                                             | 0.251    |
|                                    |            | hsa04068:FoxO signaling pathway                      | 7 (3.38)  | 0.0185                                             | 0.251    |
|                                    |            | hsa04062:Chemokine signaling pathway                 | 8 (3.86)  | 0.0266                                             | 0.331    |
|                                    |            | hsa04140:Regulation of autophagy                     | 3 (1.45)  | 0.0580                                             | 0.664    |
|                                    |            | hsa05205:Proteoglycans in cancer                     | 7 (3.38)  | 0.0940                                             | 0.961    |
|                                    |            | UP                                                   |           | hsa04932:Non-alcoholic fatty liver disease (NAFLD) | 6 (8.11) |
| hsa05016:Huntington's disease      | 6 (8.11)   |                                                      |           | 0.00232                                            | 0.122    |
| hsa00190:Oxidative phosphorylation | 4 (5.41)   |                                                      |           | 0.0273                                             | 0.848    |
| hsa05012:Parkinson's disease       | 4 (5.41)   |                                                      |           | 0.0323                                             | 0.848    |
| hsa05010:Alzheimer's disease       | 4 (5.41)   |                                                      |           | 0.0493                                             | 0.920    |

|        |                                            |           |          |         |
|--------|--------------------------------------------|-----------|----------|---------|
|        | hsa04260:Cardiac muscle contraction        | 3 (4.05)  | 0.0526   | 0.920   |
|        | hsa04066:HIF-1 signaling pathway           | 3 (4.05)  | 0.0811   | 1.00    |
| Second | DOWN                                       |           |          |         |
|        | hsa04062:Chemokine signaling pathway       | 15 (4.89) | 2.08E-05 | 0.00380 |
|        | hsa04722:Neurotrophin signaling pathway    | 11 (3.58) | 0.000144 | 0.0131  |
|        | hsa04380:Osteoclast differentiation        | 11 (3.58) | 0.000296 | 0.0180  |
|        | hsa04142:Lysosome                          | 10 (3.26) | 0.000720 | 0.0312  |
|        | hsa05203:Viral carcinogenesis              | 13 (4.23) | 0.000853 | 0.0312  |
|        | hsa04144:Endocytosis                       | 14 (4.56) | 0.00111  | 0.0340  |
|        | hsa04064:NF-kappa B signaling pathway      | 8 (2.61)  | 0.00180  | 0.0470  |
|        | hsa04662:B cell receptor signaling pathway | 7 (2.28)  | 0.00258  | 0.0548  |
|        | hsa04920:Adipocytokine signaling pathway   | 7 (2.28)  | 0.00277  | 0.0548  |
|        | hsa05152:Tuberculosis                      | 11 (3.58) | 0.00300  | 0.0548  |
|        | hsa04010:MAPK signaling pathway            | 13 (4.23) | 0.00497  | 0.0827  |
|        | hsa05169:Epstein-Barr virus infection      | 8 (2.61)  | 0.0115   | 0.176   |
|        | hsa05220:Chronic myeloid leukemia          | 6 (1.95)  | 0.0149   | 0.202   |
|        | hsa04660:T cell receptor signaling pathway | 7 (2.28)  | 0.0154   | 0.202   |
|        | hsa05168:Herpes simplex infection          | 9 (2.93)  | 0.0316   | 0.365   |
|        | hsa04145:Phagosome                         | 8 (2.61)  | 0.0319   | 0.365   |
|        | hsa04210:Apoptosis                         | 5 (1.63)  | 0.0361   | 0.389   |
|        | hsa05131:Shigellosis                       | 5 (1.63)  | 0.0399   | 0.406   |
|        | hsa03320:PPAR signaling pathway            | 5 (1.63)  | 0.0460   | 0.443   |
|        | hsa05205:Proteoglycans in cancer           | 9 (2.93)  | 0.0491   | 0.450   |

|    |                                                    |           |          |          |
|----|----------------------------------------------------|-----------|----------|----------|
|    | hsa04060:Cytokine-cytokine receptor interaction    | 10 (3.26) | 0.0571   | 0.497    |
|    | hsa04620:Toll-like receptor signaling pathway      | 6 (1.95)  | 0.0629   | 0.523    |
|    | hsa04931:Insulin resistance                        | 6 (1.95)  | 0.0671   | 0.533    |
|    | hsa05166:HTLV-I infection                          | 10 (3.26) | 0.0712   | 0.533    |
|    | hsa05161:Hepatitis B                               | 7 (2.28)  | 0.0729   | 0.533    |
|    | hsa05132:Salmonella infection                      | 5 (1.63)  | 0.0866   | 0.581    |
|    | hsa04666:Fc gamma R-mediated phagocytosis          | 5 (1.63)  | 0.0896   | 0.581    |
|    | hsa05222:Small cell lung cancer                    | 5 (1.63)  | 0.0926   | 0.581    |
|    | hsa04071:Sphingolipid signaling pathway            | 6 (1.95)  | 0.0952   | 0.581    |
|    | hsa05134:Legionellosis                             | 4 (1.3)   | 0.0952   | 0.581    |
|    | hsa05200:Pathways in cancer                        | 13 (4.23) | 0.0991   | 0.585    |
| UP | hsa03010:Ribosome                                  | 37 (24.5) | 1.04E-42 | 9.40E-41 |
|    | hsa00190:Oxidative phosphorylation                 | 13 (8.61) | 1.79E-08 | 8.07E-07 |
|    | hsa05012:Parkinson's disease                       | 12 (7.95) | 3.58E-07 | 1.07E-05 |
|    | hsa05010:Alzheimer's disease                       | 12 (7.95) | 1.93E-06 | 4.33E-05 |
|    | hsa05016:Huntington's disease                      | 12 (7.95) | 7.06E-06 | 0.000127 |
|    | hsa04932:Non-alcoholic fatty liver disease (NAFLD) | 9 (5.96)  | 0.000239 | 0.00358  |
|    | hsa04260:Cardiac muscle contraction                | 4 (2.65)  | 0.0497   | 0.639    |

Enriched KEGG pathways were yielded by DAVID (Category: KEGG\_PATHWAY) in each cohort using downregulated or upregulated DEGs.

**Supplementary Table S4. GO terms of biological process obtained using the DEGs in each cohort.**

| Cohort | Regulation | Term                                                                           | Count (%) | p-value   | FDR      |
|--------|------------|--------------------------------------------------------------------------------|-----------|-----------|----------|
| First  | DOWN       | GO:0000184~nuclear-transcribed mRNA catabolic process, nonsense-mediated decay | 12 (5.80) | 9.53E-08  | 5.99E-05 |
|        |            | GO:0006614~SRP-dependent cotranslational protein targeting to membrane         | 11 (5.31) | 9.75E-08  | 5.99E-05 |
|        |            | GO:0006413~translational initiation                                            | 12 (5.80) | 4.02E-07  | 0.000158 |
|        |            | GO:0019083~viral transcription                                                 | 11 (5.31) | 5.13E-07  | 0.000158 |
|        |            | GO:0006364~rRNA processing                                                     | 13 (6.28) | 5.37E-06  | 0.00132  |
|        |            | GO:0006412~translation                                                         | 13 (6.28) | 0.0000286 | 0.00585  |
|        |            | GO:0015031~protein transport                                                   | 15 (7.25) | 0.000149  | 0.0262   |
|        |            | GO:1902188~positive regulation of viral release from host cell                 | 4 (1.93)  | 0.000213  | 0.0327   |
|        |            | GO:0061028~establishment of endothelial barrier                                | 4 (1.93)  | 0.000695  | 0.0920   |
|        |            | GO:0006914~autophagy                                                           | 8 (3.86)  | 0.000749  | 0.0920   |
|        |            | GO:0000398~mRNA splicing, via spliceosome                                      | 10 (4.83) | 0.000907  | 0.100    |
|        |            | GO:0098609~cell-cell adhesion                                                  | 11 (5.31) | 0.000977  | 0.100    |
|        |            | GO:0035088~establishment or maintenance of apical/basal cell polarity          | 3 (1.45)  | 0.00122   | 0.115    |
|        |            | GO:0000027~ribosomal large subunit assembly                                    | 4 (1.93)  | 0.00158   | 0.139    |
|        |            | GO:0039702~viral budding via host ESCRT complex                                | 4 (1.93)  | 0.00182   | 0.149    |
|        |            | GO:0010467~gene expression                                                     | 5 (2.42)  | 0.00202   | 0.155    |



|                                                                                         |           |         |       |
|-----------------------------------------------------------------------------------------|-----------|---------|-------|
| GO:0019058~viral life cycle                                                             | 4 (1.93)  | 0.00493 | 0.336 |
| GO:0036258~multivesicular body assembly                                                 | 4 (1.93)  | 0.00493 | 0.336 |
| GO:0006366~transcription from RNA polymerase II promoter                                | 14 (6.76) | 0.00522 | 0.337 |
| GO:0016197~endosomal transport                                                          | 5 (2.42)  | 0.00639 | 0.389 |
| GO:0016032~viral process                                                                | 10 (4.83) | 0.00666 | 0.389 |
| GO:0042059~negative regulation of epidermal growth factor<br>receptor signaling pathway | 4 (1.93)  | 0.00752 | 0.420 |
| GO:0010628~positive regulation of gene expression                                       | 9 (4.35)  | 0.00948 | 0.506 |
| GO:1901673~regulation of mitotic spindle assembly                                       | 3 (1.45)  | 0.0104  | 0.531 |
| GO:0045454~cell redox homeostasis                                                       | 5 (2.42)  | 0.0109  | 0.536 |
| GO:0030033~microvillus assembly                                                         | 3 (1.45)  | 0.0152  | 0.717 |
| GO:0048013~ephrin receptor signaling pathway                                            | 5 (2.42)  | 0.0159  | 0.721 |
| GO:0000920~cell separation after cytokinesis                                            | 3 (1.45)  | 0.0170  | 0.739 |
| GO:0021762~substantia nigra development                                                 | 4 (1.93)  | 0.0175  | 0.739 |
| GO:0010824~regulation of centrosome duplication                                         | 3 (1.45)  | 0.0188  | 0.745 |
| GO:0006895~Golgi to endosome transport                                                  | 3 (1.45)  | 0.0188  | 0.745 |
| GO:0007173~epidermal growth factor receptor signaling<br>pathway                        | 4 (1.93)  | 0.0248  | 0.925 |
| GO:0034314~Arp2/3 complex-mediated actin nucleation                                     | 3 (1.45)  | 0.0249  | 0.925 |
| GO:0006367~transcription initiation from RNA polymerase II<br>promoter                  | 6 (2.90)  | 0.0282  | 0.994 |
| GO:0097352~autophagosome maturation                                                     | 3 (1.45)  | 0.0316  | 0.994 |

|                                                                                                                       |           |        |       |
|-----------------------------------------------------------------------------------------------------------------------|-----------|--------|-------|
| GO:0002181~cytoplasmic translation                                                                                    | 3 (1.45)  | 0.0316 | 0.994 |
| GO:0000122~negative regulation of transcription from RNA polymerase II promoter                                       | 15 (7.25) | 0.0319 | 0.994 |
| GO:0061763~multivesicular body-lysosome fusion                                                                        | 2 (0.966) | 0.0332 | 0.994 |
| GO:0018076~N-terminal peptidyl-lysine acetylation                                                                     | 2 (0.966) | 0.0332 | 0.994 |
| GO:0006997~nucleus organization                                                                                       | 3 (1.45)  | 0.0340 | 0.994 |
| GO:0034599~cellular response to oxidative stress                                                                      | 4 (1.93)  | 0.0350 | 0.994 |
| GO:0070979~protein K11-linked ubiquitination                                                                          | 3 (1.45)  | 0.0364 | 0.994 |
| GO:0051291~protein heterooligomerization                                                                              | 4 (1.93)  | 0.0393 | 0.994 |
| GO:0045766~positive regulation of angiogenesis                                                                        | 5 (2.42)  | 0.0403 | 0.994 |
| GO:0006461~protein complex assembly                                                                                   | 5 (2.42)  | 0.0414 | 0.994 |
| GO:0097421~liver regeneration                                                                                         | 3 (1.45)  | 0.0415 | 0.994 |
| GO:2000301~negative regulation of synaptic vesicle exocytosis                                                         | 2 (0.966) | 0.0440 | 0.994 |
| GO:0018393~internal peptidyl-lysine acetylation                                                                       | 2 (0.966) | 0.0440 | 0.994 |
| GO:0097411~hypoxia-inducible factor-1alpha signaling pathway                                                          | 2 (0.966) | 0.0440 | 0.994 |
| GO:1901888~regulation of cell junction assembly                                                                       | 2 (0.966) | 0.0440 | 0.994 |
| GO:0006990~positive regulation of transcription from RNA polymerase II promoter involved in unfolded protein response | 2 (0.966) | 0.0440 | 0.994 |
| GO:0097368~establishment of Sertoli cell barrier                                                                      | 2 (0.966) | 0.0440 | 0.994 |
| GO:0033522~histone H2A ubiquitination                                                                                 | 2 (0.966) | 0.0440 | 0.994 |
| GO:0048010~vascular endothelial growth factor signaling pathway                                                       | 4 (1.93)  | 0.0470 | 0.994 |

|                                                                         |           |        |       |
|-------------------------------------------------------------------------|-----------|--------|-------|
| GO:0045444~fat cell differentiation                                     | 4 (1.93)  | 0.0486 | 0.994 |
| GO:0006886~intracellular protein transport                              | 7 (3.38)  | 0.0500 | 0.994 |
| GO:0006283~transcription-coupled nucleotide-excision repair             | 4 (1.93)  | 0.0502 | 0.994 |
| GO:0034976~response to endoplasmic reticulum stress                     | 4 (1.93)  | 0.0519 | 0.994 |
| GO:0006511~ubiquitin-dependent protein catabolic process                | 6 (2.90)  | 0.0541 | 0.994 |
| GO:0038096~Fc-gamma receptor signaling pathway involved in phagocytosis | 5 (2.42)  | 0.0545 | 0.994 |
| GO:0022614~membrane to membrane docking                                 | 2 (0.966) | 0.0547 | 0.994 |
| GO:1901985~positive regulation of protein acetylation                   | 2 (0.966) | 0.0547 | 0.994 |
| GO:0006658~phosphatidylserine metabolic process                         | 2 (0.966) | 0.0547 | 0.994 |
| GO:0008286~insulin receptor signaling pathway                           | 4 (1.93)  | 0.0571 | 0.994 |
| GO:0007264~small GTPase mediated signal transduction                    | 7 (3.38)  | 0.0587 | 0.994 |
| GO:0030177~positive regulation of Wnt signaling pathway                 | 3 (1.45)  | 0.0613 | 0.994 |
| GO:0007080~mitotic metaphase plate congression                          | 3 (1.45)  | 0.0643 | 0.994 |
| GO:0008543~fibroblast growth factor receptor signaling pathway          | 4 (1.93)  | 0.0644 | 0.994 |
| GO:0050792~regulation of viral process                                  | 2 (0.966) | 0.0653 | 0.994 |
| GO:0009790~embryo development                                           | 3 (1.45)  | 0.0674 | 0.994 |
| GO:0006605~protein targeting                                            | 3 (1.45)  | 0.0705 | 0.994 |
| GO:0036089~cleavage furrow formation                                    | 2 (0.966) | 0.0758 | 0.994 |
| GO:0071312~cellular response to alkaloid                                | 2 (0.966) | 0.0758 | 0.994 |
| GO:0009411~response to UV                                               | 3 (1.45)  | 0.0802 | 0.994 |

|    |                                                                                    |           |          |       |
|----|------------------------------------------------------------------------------------|-----------|----------|-------|
|    | GO:0051496~positive regulation of stress fiber assembly                            | 3 (1.45)  | 0.0802   | 0.994 |
|    | GO:0090002~establishment of protein localization to plasma membrane                | 3 (1.45)  | 0.0802   | 0.994 |
|    | GO:0031623~receptor internalization                                                | 3 (1.45)  | 0.0835   | 0.994 |
|    | GO:0043966~histone H3 acetylation                                                  | 3 (1.45)  | 0.0835   | 0.994 |
|    | GO:0030838~positive regulation of actin filament polymerization                    | 3 (1.45)  | 0.0903   | 0.994 |
|    | GO:0071456~cellular response to hypoxia                                            | 4 (1.93)  | 0.0930   | 0.994 |
|    | GO:0015825~L-serine transport                                                      | 2 (0.966) | 0.0964   | 0.994 |
|    | GO:0006473~protein acetylation                                                     | 2 (0.966) | 0.0964   | 0.994 |
|    | GO:1904754~positive regulation of vascular associated smooth muscle cell migration | 2 (0.966) | 0.0964   | 0.994 |
|    | GO:0032956~regulation of actin cytoskeleton organization                           | 3 (1.45)  | 0.0972   | 0.994 |
|    | GO:0070936~protein K48-linked ubiquitination                                       | 3 (1.45)  | 0.0972   | 0.994 |
|    | GO:0045860~positive regulation of protein kinase activity                          | 3 (1.45)  | 0.0972   | 0.994 |
| UP | GO:0043434~response to peptide hormone                                             | 4 (5.41)  | 0.000543 | 0.304 |
|    | GO:0043066~negative regulation of apoptotic process                                | 8 (10.8)  | 0.00126  | 0.304 |
|    | GO:0006122~mitochondrial electron transport, ubiquinol to cytochrome c             | 3 (4.05)  | 0.00132  | 0.304 |
|    | GO:0043488~regulation of mRNA stability                                            | 4 (5.41)  | 0.00623  | 1.00  |
|    | GO:0031394~positive regulation of prostaglandin biosynthetic process               | 2 (0.966) | 0.0145   | 1.00  |
|    | GO:1902600~hydrogen ion transmembrane transport                                    | 3 (4.05)  | 0.0207   | 1.00  |

|                                                                                               |           |        |      |
|-----------------------------------------------------------------------------------------------|-----------|--------|------|
| GO:0010042~response to manganese ion                                                          | 2 (2.7)   | 0.0216 | 1.00 |
| GO:0032496~response to lipopolysaccharide                                                     | 4 (5.41)  | 0.0218 | 1.00 |
| GO:0032436~positive regulation of proteasomal ubiquitin-3 dependent protein catabolic process | 4 (4.05)  | 0.0227 | 1.00 |
| GO:0031340~positive regulation of vesicle fusion                                              | 2 (0.966) | 0.0252 | 1.00 |
| GO:0090050~positive regulation of cell migration involved in sprouting angiogenesis           | 2 (0.966) | 0.0252 | 1.00 |
| GO:0042060~wound healing                                                                      | 3 (4.05)  | 0.0342 | 1.00 |
| GO:0006928~movement of cell or subcellular component                                          | 3 (4.05)  | 0.0390 | 1.00 |
| GO:0032355~response to estradiol                                                              | 3 (4.05)  | 0.0432 | 1.00 |
| GO:0008283~cell proliferation                                                                 | 5 (6.76)  | 0.0439 | 1.00 |
| GO:0006119~oxidative phosphorylation                                                          | 2 (0.966) | 0.0462 | 1.00 |
| GO:0071456~cellular response to hypoxia                                                       | 3 (4.05)  | 0.0476 | 1.00 |
| GO:0042633~hair cycle                                                                         | 2 (0.966) | 0.0531 | 1.00 |
| GO:0030224~monocyte differentiation                                                           | 2 (0.966) | 0.0600 | 1.00 |
| GO:0060749~mammary gland alveolus development                                                 | 2 (0.966) | 0.0600 | 1.00 |
| GO:0071356~cellular response to tumor necrosis factor                                         | 3 (4.05)  | 0.0606 | 1.00 |
| GO:0030225~macrophage differentiation                                                         | 2 (0.966) | 0.0634 | 1.00 |
| GO:0033280~response to vitamin D                                                              | 2 (0.966) | 0.0634 | 1.00 |
| GO:0051493~regulation of cytoskeleton organization                                            | 2 (0.966) | 0.0668 | 1.00 |
| GO:0071385~cellular response to glucocorticoid stimulus                                       | 2 (0.966) | 0.0702 | 1.00 |
| GO:0046697~decidualization                                                                    | 2 (0.966) | 0.0702 | 1.00 |

|        |                                                                           |           |          |        |
|--------|---------------------------------------------------------------------------|-----------|----------|--------|
|        | GO:0045087~innate immune response                                         | 5 (6.76)  | 0.0708   | 1.00   |
|        | GO:0010951~negative regulation of endopeptidase activity                  | 3 (4.05)  | 0.0716   | 1.00   |
|        | GO:0051894~positive regulation of focal adhesion assembly                 | 2 (0.966) | 0.0736   | 1.00   |
|        | GO:0098609~cell-cell adhesion                                             | 4 (5.41)  | 0.0756   | 1.00   |
|        | GO:0007166~cell surface receptor signaling pathway                        | 4 (5.41)  | 0.0776   | 1.00   |
|        | GO:0030036~actin cytoskeleton organization                                | 3 (4.05)  | 0.0810   | 1.00   |
|        | GO:0030099~myeloid cell differentiation                                   | 2 (0.966) | 0.0837   | 1.00   |
|        | GO:0072661~protein targeting to plasma membrane                           | 2 (0.966) | 0.0903   | 1.00   |
|        | GO:0008360~regulation of cell shape                                       | 3 (4.05)  | 0.0919   | 1.00   |
|        | GO:0032007~negative regulation of TOR signaling                           | 2 (0.966) | 0.0970   | 1.00   |
|        | GO:0042493~response to drug                                               | 4 (5.41)  | 0.0985   | 1.00   |
| Second | DOWN                                                                      |           |          |        |
|        | GO:0006954~inflammatory response                                          | 21 (6.84) | 7.44E-06 | 0.0126 |
|        | GO:0098609~cell-cell adhesion                                             | 16 (5.21) | 6.14E-05 | 0.0294 |
|        | GO:0007264~small GTPase mediated signal transduction                      | 15 (4.89) | 8.02E-05 | 0.0294 |
|        | GO:0043123~positive regulation of I-kappaB kinase/NF-kappaB signaling     | 12 (3.91) | 9.44E-05 | 0.0294 |
|        | GO:0006915~apoptotic process                                              | 24 (7.82) | 0.000102 | 0.0294 |
|        | GO:0071356~cellular response to tumor necrosis factor                     | 10 (3.26) | 0.000104 | 0.0294 |
|        | GO:0032088~negative regulation of NF-kappaB transcription factor activity | 8 (2.61)  | 0.000194 | 0.0468 |
|        | GO:0007165~signal transduction                                            | 37 (12.1) | 0.000312 | 0.0660 |
|        | GO:0051092~positive regulation of NF-kappaB transcription                 | 10 (3.26) | 0.000436 | 0.0819 |

|                                                                                                       |           |          |       |  |
|-------------------------------------------------------------------------------------------------------|-----------|----------|-------|--|
| factor activity                                                                                       |           |          |       |  |
| GO:0071222~cellular response to lipopolysaccharide                                                    | 9 (2.93)  | 0.000670 | 0.113 |  |
| GO:0051591~response to cAMP                                                                           | 6 (1.95)  | 0.00104  | 0.160 |  |
| GO:0045944~positive regulation of transcription from RNA polymerase II promoter                       | 31 (10.1) | 0.00125  | 0.175 |  |
| GO:0032496~response to lipopolysaccharide                                                             | 10 (3.26) | 0.00193  | 0.239 |  |
| GO:0043066~negative regulation of apoptotic process                                                   | 18 (5.86) | 0.00198  | 0.239 |  |
| GO:0050731~positive regulation of peptidyl-tyrosine phosphorylation                                   | 7 (2.28)  | 0.00265  | 0.299 |  |
| GO:0006968~cellular defense response                                                                  | 6 (1.95)  | 0.00394  | 0.416 |  |
| GO:0042127~regulation of cell proliferation                                                           | 10 (3.26) | 0.00431  | 0.429 |  |
| GO:0006952~defense response                                                                           | 6 (1.95)  | 0.00549  | 0.467 |  |
| GO:0010886~positive regulation of cholesterol storage                                                 | 3 (0.977) | 0.00566  | 0.467 |  |
| GO:0038066~p38MAPK cascade                                                                            | 3 (0.977) | 0.00566  | 0.467 |  |
| GO:0007265~Ras protein signal transduction                                                            | 6 (1.95)  | 0.00661  | 0.467 |  |
| GO:0035335~peptidyl-tyrosine dephosphorylation                                                        | 7 (2.28)  | 0.00670  | 0.467 |  |
| GO:0071347~cellular response to interleukin-1                                                         | 6 (1.95)  | 0.00701  | 0.467 |  |
| GO:0070098~chemokine-mediated signaling pathway                                                       | 6 (1.95)  | 0.00701  | 0.467 |  |
| GO:0034383~low-density lipoprotein particle clearance                                                 | 3 (0.977) | 0.00746  | 0.467 |  |
| GO:0061179~negative regulation of insulin secretion involved in cellular response to glucose stimulus | 3 (0.977) | 0.00746  | 0.467 |  |
| GO:0048227~plasma membrane to endosome transport                                                      | 3 (0.977) | 0.00746  | 0.467 |  |

|                                                                    |           |         |       |
|--------------------------------------------------------------------|-----------|---------|-------|
| GO:0051056~regulation of small GTPase mediated signal transduction | 8 (2.61)  | 0.00780 | 0.471 |
| GO:0000188~inactivation of MAPK activity                           | 4 (1.30)  | 0.00836 | 0.487 |
| GO:0016236~macroautophagy                                          | 6 (1.95)  | 0.00930 | 0.509 |
| GO:0015992~proton transport                                        | 5 (1.63)  | 0.00934 | 0.509 |
| GO:0007266~Rho protein signal transduction                         | 5 (1.63)  | 0.0100  | 0.529 |
| GO:0006468~protein phosphorylation                                 | 16 (5.21) | 0.0111  | 0.566 |
| GO:0034097~response to cytokine                                    | 5 (1.63)  | 0.0115  | 0.571 |
| GO:0016311~dephosphorylation                                       | 6 (1.95)  | 0.0153  | 0.739 |
| GO:0061158~3'-UTR-mediated mRNA destabilization                    | 3 (0.977) | 0.0168  | 0.767 |
| GO:0001706~endoderm formation                                      | 3 (0.977) | 0.0168  | 0.767 |
| GO:0015031~protein transport                                       | 14 (4.56) | 0.0172  | 0.767 |
| GO:0043922~negative regulation by host of viral transcription      | 3 (0.977) | 0.0197  | 0.811 |
| GO:0071850~mitotic cell cycle arrest                               | 3 (0.977) | 0.0197  | 0.811 |
| GO:0006950~response to stress                                      | 5 (1.63)  | 0.0197  | 0.811 |
| GO:0050727~regulation of inflammatory response                     | 5 (1.63)  | 0.0219  | 0.871 |
| GO:0043407~negative regulation of MAP kinase activity              | 4 (1.30)  | 0.0227  | 0.871 |
| GO:0031929~TOR signaling                                           | 3 (0.977) | 0.0227  | 0.871 |
| GO:0006974~cellular response to DNA damage stimulus                | 9 (2.93)  | 0.0254  | 0.921 |
| GO:0030593~neutrophil chemotaxis                                   | 5 (1.63)  | 0.0255  | 0.921 |
| GO:0006914~autophagy                                               | 7 (2.28)  | 0.0256  | 0.921 |



|                                                                                        |           |        |       |
|----------------------------------------------------------------------------------------|-----------|--------|-------|
| GO:0006469~negative regulation of protein kinase activity                              | 6 (1.95)  | 0.0264 | 0.929 |
| GO:0043124~negative regulation of I-kappaB kinase/NF-kappaB signaling                  | 4 (1.30)  | 0.0299 | 0.996 |
| GO:0008654~phospholipid biosynthetic process                                           | 4 (1.30)  | 0.0299 | 0.996 |
| GO:0008360~regulation of cell shape                                                    | 7 (2.28)  | 0.0318 | 0.996 |
| GO:0050860~negative regulation of T cell receptor signaling pathway                    | 3 (0.977) | 0.0328 | 0.996 |
| GO:1904582~positive regulation of intracellular mRNA localization                      | 2 (0.651) | 0.0335 | 0.996 |
| GO:0031086~nuclear-transcribed mRNA catabolic process, deadenylation-independent decay | 2 (0.651) | 0.0335 | 0.996 |
| GO:1902172~regulation of keratinocyte apoptotic process                                | 2 (0.651) | 0.0335 | 0.996 |
| GO:0002548~monocyte chemotaxis                                                         | 4 (1.30)  | 0.0338 | 0.996 |
| GO:0050729~positive regulation of inflammatory response                                | 5 (1.63)  | 0.0351 | 0.996 |
| GO:0045444~fat cell differentiation                                                    | 5 (1.63)  | 0.0351 | 0.996 |
| GO:0030334~regulation of cell migration                                                | 5 (1.63)  | 0.0367 | 0.996 |
| GO:0007596~blood coagulation                                                           | 8 (2.61)  | 0.0370 | 0.996 |
| GO:0000122~negative regulation of transcription from polymerase II promoter            | 20 (6.51) | 0.0373 | 0.996 |
| GO:0032870~cellular response to hormone stimulus                                       | 4 (1.30)  | 0.0403 | 0.996 |
| GO:0045638~negative regulation of myeloid cell differentiation                         | 3 (0.977) | 0.0403 | 0.996 |
| GO:0035556~intracellular signal transduction                                           | 13 (4.23) | 0.0421 | 0.996 |

|                                                                     |           |        |       |
|---------------------------------------------------------------------|-----------|--------|-------|
| GO:0043153~entrainment of circadian clock by photoperiod            | 3 (0.977) | 0.0443 | 0.996 |
| GO:0030168~platelet activation                                      | 6 (1.95)  | 0.0457 | 0.996 |
| GO:0006886~intracellular protein transport                          | 9 (2.93)  | 0.0479 | 0.996 |
| GO:0042346~positive regulation of NF-kappaB import into nucleus     | 3 (0.977) | 0.0485 | 0.996 |
| GO:0007254~JNK cascade                                              | 4 (1.30)  | 0.0499 | 0.996 |
| GO:0006629~lipid metabolic process                                  | 7 (2.28)  | 0.0508 | 0.996 |
| GO:0034113~heterotypic cell-cell adhesion                           | 3 (0.977) | 0.0527 | 0.996 |
| GO:0001954~positive regulation of cell-matrix adhesion              | 3 (0.977) | 0.0527 | 0.996 |
| GO:0006935~chemotaxis                                               | 6 (1.95)  | 0.0563 | 0.996 |
| GO:0043547~positive regulation of GTPase activity                   | 16 (5.21) | 0.0577 | 0.996 |
| GO:0007422~peripheral nervous system development                    | 3 (0.977) | 0.0616 | 0.996 |
| GO:0019915~lipid storage                                            | 3 (0.977) | 0.0616 | 0.996 |
| GO:0048146~positive regulation of fibroblast proliferation          | 4 (1.30)  | 0.0632 | 0.996 |
| GO:0050859~negative regulation of B cell receptor signaling pathway | 2 (0.651) | 0.0660 | 0.996 |
| GO:0016032~viral process                                            | 10 (3.26) | 0.0686 | 0.996 |
| GO:0001570~vasculogenesis                                           | 4 (1.30)  | 0.0690 | 0.996 |
| GO:0019432~triglyceride biosynthetic process                        | 3 (0.977) | 0.0710 | 0.996 |
| GO:0051928~positive regulation of calcium ion transport             | 3 (0.977) | 0.0710 | 0.996 |
| GO:0046777~protein autophosphorylation                              | 7 (2.28)  | 0.0724 | 0.996 |
| GO:0006661~phosphatidylinositol biosynthetic process                | 4 (1.30)  | 0.0749 | 0.996 |

|                                                                                                                             |           |        |       |
|-----------------------------------------------------------------------------------------------------------------------------|-----------|--------|-------|
| GO:0070373~negative regulation of ERK1 and ERK2 cascade                                                                     | 4 (1.30)  | 0.0749 | 0.996 |
| GO:0090383~phagosome acidification                                                                                          | 3 (0.977) | 0.0759 | 0.996 |
| GO:0009612~response to mechanical stimulus                                                                                  | 4 (1.30)  | 0.0780 | 0.996 |
| GO:0032715~negative regulation of interleukin-6 production                                                                  | 3 (0.977) | 0.0808 | 0.996 |
| GO:0048247~lymphocyte chemotaxis                                                                                            | 3 (0.977) | 0.0808 | 0.996 |
| GO:0051881~regulation of mitochondrial membrane potential                                                                   | 3 (0.977) | 0.0808 | 0.996 |
| GO:0070431~nucleotide-binding oligomerization domain2 (0.651) containing 2 signaling pathway                                |           | 0.0818 | 0.996 |
| GO:0015833~peptide transport                                                                                                | 2 (0.651) | 0.0818 | 0.996 |
| GO:0010656~negative regulation of muscle cell apoptotic process                                                             | 2 (0.651) | 0.0818 | 0.996 |
| GO:0042634~regulation of hair cycle                                                                                         | 2 (0.651) | 0.0818 | 0.996 |
| GO:1990441~negative regulation of transcription from RNA polymerase II promoter in response to endoplasmic reticulum stress | 2 (0.651) | 0.0818 | 0.996 |
| GO:2001046~positive regulation of integrin-mediated signaling pathway                                                       | 2 (0.651) | 0.0818 | 0.996 |
| GO:0001933~negative regulation of protein phosphorylation                                                                   | 4 (1.30)  | 0.0843 | 0.996 |
| GO:0007229~integrin-mediated signaling pathway                                                                              | 5 (1.63)  | 0.0871 | 0.996 |
| GO:0006897~endocytosis                                                                                                      | 6 (1.95)  | 0.0873 | 0.996 |
| GO:0010468~regulation of gene expression                                                                                    | 5 (1.63)  | 0.0896 | 0.996 |
| GO:2000379~positive regulation of reactive oxygen species                                                                   | 3 (0.977) | 0.0910 | 0.996 |

|    |                                                                                |           |          |          |
|----|--------------------------------------------------------------------------------|-----------|----------|----------|
|    | metabolic process                                                              |           |          |          |
|    | GO:0006611~protein export from nucleus                                         | 3 (0.977) | 0.0910   | 0.996    |
|    | GO:0044344~cellular response to fibroblast growth factor stimulus              | 3 (0.977) | 0.0910   | 0.996    |
|    | GO:0007050~cell cycle arrest                                                   | 6 (1.95)  | 0.0914   | 0.996    |
|    | GO:0030335~positive regulation of cell migration                               | 7 (2.28)  | 0.0921   | 0.996    |
|    | GO:0007166~cell surface receptor signaling pathway                             | 9 (2.93)  | 0.0945   | 0.996    |
|    | GO:0030100~regulation of endocytosis                                           | 3 (0.977) | 0.0962   | 0.996    |
|    | GO:0045577~regulation of B cell differentiation                                | 2 (0.651) | 0.0973   | 0.996    |
|    | GO:0045084~positive regulation of interleukin-12 biosynthetic process          | 2 (0.651) | 0.0973   | 0.996    |
|    | GO:0046578~regulation of Ras protein signal transduction                       | 2 (0.651) | 0.0973   | 0.996    |
|    | GO:0070245~positive regulation of thymocyte apoptotic process                  | 2 (0.651) | 0.0973   | 0.996    |
|    | GO:0032680~regulation of tumor necrosis factor production                      | 2 (0.651) | 0.0973   | 0.996    |
|    | GO:0001701~in utero embryonic development                                      | 7 (2.28)  | 0.0983   | 0.996    |
| UP | GO:0006614~SRP-dependent cotranslational protein targeting to membrane         | 37 (24.5) | 1.12E-52 | 7.11E-50 |
|    | GO:0000184~nuclear-transcribed mRNA catabolic process, nonsense-mediated decay | 38 (25.2) | 3.89E-50 | 1.23E-47 |
|    | GO:0019083~viral transcription                                                 | 37 (24.5) | 2.29E-49 | 3.88E-47 |
|    | GO:0006413~translational initiation                                            | 39 (25.8) | 2.45E-49 | 3.88E-47 |
|    | GO:0006364~rRNA processing                                                     | 38 (25.2) | 1.18E-39 | 1.49E-37 |

|                                                                 |           |          |          |
|-----------------------------------------------------------------|-----------|----------|----------|
| GO:0006412~translation                                          | 37 (24.5) | 2.28E-35 | 2.40E-33 |
| GO:0031424~keratinization                                       | 16 (10.6) | 1.16E-20 | 1.05E-18 |
| GO:0008544~epidermis development                                | 18 (11.9) | 1.31E-19 | 1.04E-17 |
| GO:0030216~keratinocyte differentiation                         | 16 (10.6) | 2.48E-17 | 1.75E-15 |
| GO:0018149~peptide cross-linking                                | 12 (7.95) | 1.45E-13 | 9.21E-12 |
| GO:0002181~cytoplasmic translation                              | 8 (5.30)  | 7.12E-10 | 4.10E-08 |
| GO:0000028~ribosomal small subunit assembly                     | 5 (3.31)  | 1.33E-05 | 0.000702 |
| GO:0042274~ribosomal small subunit biogenesis                   | 4 (2.65)  | 0.000252 | 0.0123   |
| GO:0061436~establishment of skin barrier                        | 4 (2.65)  | 0.000363 | 0.0165   |
| GO:1902600~hydrogen ion transmembrane transport                 | 5 (3.31)  | 0.00138  | 0.0567   |
| GO:0098609~cell-cell adhesion                                   | 9 (5.96)  | 0.00143  | 0.0567   |
| GO:0042254~ribosome biogenesis                                  | 4 (2.65)  | 0.00287  | 0.107    |
| GO:0002009~morphogenesis of an epithelium                       | 3 (1.99)  | 0.00532  | 0.188    |
| GO:0045104~intermediate filament cytoskeleton organization      | 3 (1.99)  | 0.00611  | 0.194    |
| GO:0042633~hair cycle                                           | 3 (1.99)  | 0.00611  | 0.194    |
| GO:0006120~mitochondrial electron transport, NADH to ubiquinone | 4 (2.65)  | 0.00686  | 0.207    |
| GO:0006091~generation of precursor metabolites and energy       | 4 (2.65)  | 0.00853  | 0.242    |
| GO:0006414~translational elongation                             | 3 (1.99)  | 0.00877  | 0.242    |
| GO:0042776~mitochondrial ATP synthesis coupled proton transport | 3 (1.99)  | 0.0118   | 0.300    |
| GO:0000027~ribosomal large subunit assembly                     | 3 (1.99)  | 0.0118   | 0.300    |

|                                                                                                |           |        |       |
|------------------------------------------------------------------------------------------------|-----------|--------|-------|
| GO:0032981~mitochondrial respiratory chain complex assembly                                    | 14 (2.65) | 0.0137 | 0.333 |
| GO:0071624~positive regulation of granulocyte chemotaxis                                       | 2 (1.32)  | 0.0158 | 0.371 |
| GO:0042273~ribosomal large subunit biogenesis                                                  | 3 (1.99)  | 0.0166 | 0.375 |
| GO:0006336~DNA replication-independent nucleosome assembly                                     | 3 (1.99)  | 0.0179 | 0.391 |
| GO:0031069~hair follicle morphogenesis                                                         | 3 (1.99)  | 0.0192 | 0.406 |
| GO:0006754~ATP biosynthetic process                                                            | 3 (1.99)  | 0.0220 | 0.45  |
| GO:0045110~intermediate filament bundle assembly                                               | 2 (1.32)  | 0.0236 | 0.467 |
| GO:0006335~DNA replication-dependent nucleosome assembly                                       | 3 (1.99)  | 0.0264 | 0.508 |
| GO:0051343~positive regulation of cyclic-nucleotide phosphodiesterase activity                 | 2 (1.32)  | 0.0390 | 0.727 |
| GO:0006986~response to unfolded protein                                                        | 3 (1.99)  | 0.0436 | 0.775 |
| GO:0006469~negative regulation of protein kinase activity                                      | 4 (2.65)  | 0.0440 | 0.775 |
| GO:0034080~CENP-A containing nucleosome assembly                                               | 3 (1.99)  | 0.0455 | 0.780 |
| GO:0001649~osteoblast differentiation                                                          | 4 (2.65)  | 0.0497 | 0.828 |
| GO:0021762~substantia nigra development                                                        | 3 (1.99)  | 0.0575 | 0.935 |
| GO:0045814~negative regulation of gene expression, epigenetic                                  | 3 (1.99)  | 0.0596 | 0.945 |
| GO:0000463~maturation of LSU-rRNA from tricistronic transcript (SSU-rRNA, 5.8S rRNA, LSU-rRNA) | 2 (1.32)  | 0.0691 | 0.981 |

|                                                               |          |        |       |
|---------------------------------------------------------------|----------|--------|-------|
| GO:0070301~cellular response to hydrogen peroxide             | 3 (1.99) | 0.0750 | 0.981 |
| GO:0017148~negative regulation of translation                 | 3 (1.99) | 0.0772 | 0.981 |
| GO:0045815~positive regulation of gene expression, epigenetic | 3 (1.99) | 0.0866 | 0.981 |
| GO:0031581~hemidesmosome assembly                             | 2 (1.32) | 0.0910 | 0.981 |
| GO:0000086~G2/M transition of mitotic cell cycle              | 4 (2.65) | 0.0951 | 0.981 |

---

GO terms were yielded by DAVID (Category: GOTERM\_BP\_DIRECT) in each cohort using downregulated or upregulated DEGs.

**Supplementary Table S5. GO terms of biological process obtained using common DEGs in both cohorts.**

| Term                                            | Count (%) | <i>p</i> -value | FDR   |
|-------------------------------------------------|-----------|-----------------|-------|
| GO:0006954~inflammatory response                | 4 (23.5)  | 0.00424         | 0.582 |
| GO:0071621~granulocyte chemotaxis               | 2 (11.8)  | 0.00446         | 0.582 |
| GO:0002548~monocyte chemotaxis                  | 2 (11.8)  | 0.0369          | 1.00  |
| GO:0031532~actin cytoskeleton reorganization    | 2 (11.8)  | 0.0412          | 1.00  |
| GO:0019722~calcium-mediated signaling           | 2 (11.8)  | 0.0446          | 1.00  |
| GO:0070098~chemokine-mediated signaling pathway | 2 (11.8)  | 0.0616          | 1.00  |
| GO:0030334~regulation of cell migration         | 2 (11.8)  | 0.0641          | 1.00  |
| GO:0030216~keratinocyte differentiation         | 2 (11.8)  | 0.0658          | 1.00  |
| GO:0008544~epidermis development                | 2 (11.8)  | 0.0733          | 1.00  |

GO terms were yielded by DAVID (Category: GOTERM\_BP\_DIRECT) using the common DEGs in both cohorts.



**Supplementary Table S6. Correlation between SSL-RNA expression and levodopa dose (top10 genes).**

| Positively correlated genes |       |           |       | Negatively correlated genes |        |          |       |
|-----------------------------|-------|-----------|-------|-----------------------------|--------|----------|-------|
| Symbol                      | rho   | p-value   | FDR   | Symbol                      | rho    | p-value  | FDR   |
| <i>FADS2</i>                | 0.566 | 0.0000415 | 0.194 | <i>ENO1</i>                 | -0.502 | 0.000373 | 0.558 |
| <i>UBIAD1</i>               | 0.512 | 0.000277  | 0.558 | <i>CD52</i>                 | -0.472 | 0.000917 | 0.558 |
| <i>PLIN5</i>                | 0.464 | 0.00115   | 0.558 | <i>SUB1</i>                 | -0.464 | 0.00118  | 0.558 |
| <i>MARCH5</i>               | 0.451 | 0.00166   | 0.558 | <i>RGS1</i>                 | -0.462 | 0.00122  | 0.558 |
| <i>HILPDA</i>               | 0.449 | 0.00174   | 0.558 | <i>LDHA</i>                 | -0.461 | 0.00125  | 0.558 |
| <i>RUSC2</i>                | 0.448 | 0.00181   | 0.558 | <i>PDCD5</i>                | -0.457 | 0.00143  | 0.558 |
| <i>H1FO</i>                 | 0.442 | 0.00213   | 0.558 | <i>ACSL5</i>                | -0.438 | 0.00232  | 0.558 |
| <i>LOC100093631</i>         | 0.429 | 0.00290   | 0.558 | <i>HSP90B1</i>              | -0.437 | 0.00238  | 0.558 |
| <i>PNPLA5</i>               | 0.429 | 0.00292   | 0.558 | <i>POLR2E</i>               | -0.430 | 0.00282  | 0.558 |
| <i>FYCO1</i>                | 0.424 | 0.00329   | 0.558 | <i>PFDN5</i>                | -0.428 | 0.00301  | 0.558 |

Correlation between SSL-RNA expression level [ $\log_2$  (normalized count + 1)] and levodopa dose (mg) was calculated using Spearman's correlation coefficient (rho).
